# Supplementary material
Source: PubMed Central journal article supplement (PMC3583341)
Supplement: NIHMS437093-supplement-01.pdf [file NIHMS437093-supplement-01.pdf]

PRETERM BIRTH AND FUTURE MATERNAL BLOOD PRESSURE, INFLAMMATION AND INTIMAL MEDIAL THICKNESS: THE  
CARDIA STUDY

Running title: Preterm birth, blood pressure, and IMT

Janet M Catov, PhD MS; Cora E Lewis, M.D; Minjae Lee, PhD; Melissa F Wellons, MD, Erica P Gunderson, PhD.

Corresponding Author:

Janet M. Catov, PhD MS

Assistant Professor

Department of Obstetrics, Gynecology & Reproductive Sciences

University of Pittsburgh School of Medicine

300 Halket Street

Pittsburgh, PA 15213

412.641.6217 (phone)

412.641.1133 (fax)

catovjm@upmc.edu

Cora E Lewis, MD, MSPH

University of Alabama at Birmingham Preventive Medicine

Minjae Lee, PhD

University of Texas Health Science Center at Houston

Melissa F Wellons, MD

University of Alabama School of Medicine

Erica P Gunderson, PhD

Kaiser Permanente Division of Research

**S 1. Maternal characteristics at baseline according to preterm birth status (n=916)**

| <b>Maternal Characteristic</b>                         | <b>Term<br/>(n=690)</b> | <b>Preterm<br/>(n=226)</b> | <b>P value</b> |
|--------------------------------------------------------|-------------------------|----------------------------|----------------|
| <b>Age, years (SD)</b>                                 | 24.32(3.71)             | 24.10(3.71)                | 0.45           |
| <b>Black race (n, %)</b>                               | 283(41.01)              | 141(62.39)                 | <0.0001        |
| <b>Education (n, %)</b>                                |                         |                            | 0.0003         |
| <High school education                                 | 33(4.78)                | 17(7.52)                   |                |
| High school education                                  | 159(23.04)              | 80(35.40)                  |                |
| Some college                                           | 250(36.23)              | 71(31.42)                  |                |
| >4 yr college or more                                  | 248(35.94)              | 58(25.66)                  |                |
| <b>Parous at baseline (n, %)</b>                       | 189(27.39)              | 81(35.84)                  | 0.02           |
| <b>Gestational diabetes (n, %)</b>                     | 84 (12.1)               | 30 (13.2)                  | 0.57           |
| <b>Alcohol use, any (n, %)</b>                         | 397(57.70)              | 109(48.44)                 | 0.02           |
| <b>Hypertension (n, %)</b>                             |                         |                            |                |
| During pregnancy (ever)                                | 159(23.11)              | 75(33.19)                  | <0.01          |
| Before index pregnancy                                 | 16(2.32)                | 8(3.56)                    | 0.31           |
| After index pregnancy                                  | 121(17.54)              | 63(28.00)                  | <0.001         |
| <b>Age at delivery, year (SD)</b>                      | 30.51(4.65)             | 29.89(5.09)                | 0.11           |
| <b>Time from baseline to index delivery, year (SD)</b> | 6.22(4.10)              | 5.81(4.23)                 | 0.09           |
| <b>Physical activity (exercise units, SD)</b>          |                         |                            | 0.08           |
| 1st quartile                                           | 160(23.19)              | 69(30.53)                  |                |
| 2nd quartile                                           | 173(25.07)              | 58(25.66)                  |                |
| 3rd quartile                                           | 173(25.07)              | 54(23.89)                  |                |
| 4th quartile                                           | 184(26.67)              | 45(19.91)                  |                |

**S2. Blood pressure and BMI at baseline and year 20, stratified by race**

| Characteristic             | <u>Term (n=407)</u> |               | <u>White (n=492)</u> |               | P value*   | <u>Term (n=283)</u> |               | <u>Black (n=424)</u> |               | P value*      |            |      |
|----------------------------|---------------------|---------------|----------------------|---------------|------------|---------------------|---------------|----------------------|---------------|---------------|------------|------|
|                            | Baseline            | Year 20       | Preterm (n=85)       | Year 20       |            | Baseline            | Year 20       | Preterm (n=141)      | Year 20       |               |            |      |
| <b>Systolic BP (mmHg)</b>  | 104 (9)             | 107 (9)       | 107 (9)              | 109 (13)      | Group      | <0.01               | 107 (9)       | 116 (15)             | 107 (9)       | 119 (17)      | Group      | 0.94 |
|                            |                     |               |                      |               | Group*time | 0.03                |               |                      |               |               | Group*time | 0.05 |
| <b>Diastolic BP (mmHg)</b> | 65 (9)              | 66 (10)       | 66 (8)               | 68 (12)       | Group      | 0.53                | 69 (10)       | 74 (11)              | 66 (9)        | 76 (11)       | Group      | 0.50 |
|                            |                     |               |                      |               | Group*time | 0.54                |               |                      |               |               | Group*time | 0.16 |
| <b>BMI (k/m2)</b>          | 22.1<br>(3.1)       | 26.4<br>(6.3) | 23.4<br>(4.3)        | 27.8<br>(6.5) | Group      | 0.01                | 25.1<br>(5.6) | 32.3<br>(7.8)        | 24.2<br>(4.7) | 31.3<br>(7.2) | Group      | 0.06 |
|                            |                     |               |                      |               | Group*time | 0.85                |               |                      |               |               | Group*time | 0.40 |

\* Group and group\* time p values derived from GEE models
